# Supplementary material for: Facile synthesis of porous PdCu nanoboxes for efficient chromium(vi) reduction
Source: Royal Society of Chemistry journal article supplement (doi:10.1039/c9ce00457b), 2019-01-01
Supplement: c9ce00457b1.pdf [file c9ce00457b1.pdf]

## Electronic Supporting Information

### Facile synthesis of porous PdCu nanoboxes for efficient chromium (VI) reduction

Bin Qiao,<sup>a</sup> Jingyi Zhu,<sup>a</sup> Yanping Liu,<sup>a</sup> Yu Chen,<sup>a</sup> Gengtao Fu<sup>\*b</sup> and Pei Chen<sup>\*a</sup>

<sup>a</sup> Key Laboratory of Applied Surface and Colloid Chemistry (MOF), Key Laboratory of Macromolecular Science of Shaanxi Province, School of Materials Science and Engineering, Shaanxi Normal University, Xi'an, 710062, PR China.

<sup>b</sup> School of Chemical and Biomedical Engineering, Nanyang Technological University, Singapore 637459, Singapore

\* Corresponding authors.

E-mail addresses: chenpei@snnu.edu.cn (P. Chen); gengtaofu@gmail.com (G. Fu).

## **Experimental**

### **Reagents and Chemicals**

Potassium chloropalladite (II) ( $K_2PdCl_4$ ) was purchased from Beijing HWRK chem Co., Ltd (Beijing, China). Potassium dichromate ( $K_2Cr_2O_7$ ) and poly(acrylic acid sodium salt) (PAA, weight-average molecular weight 5000) were purchased from Sigma-Aldrich (Shanghai, China). Copper(II) chloride dihydrate ( $CuCl_2 \cdot H_2O$ ), potassium hydroxide (KOH), sodium hydroxide (NaOH), ammonia solution ( $NH_3 \cdot H_2O$ , 28%), formic acid (HCOOH, 96%) and L-Ascorbic acid (AA) were purchased from Sinopharm Chemical Reagent Co., Ltd (Shanghai, China). Commercial Pd black from Johnson Matthey were purchased from Shanghai Hesun electrical corporation (Shanghai, China). All chemical reagents were of analytical reagent grade and used without further purification.

### **Instruments**

Scanning electron microscopy (SEM) images and energy dispersive X-ray analysis (EDX) were taken on a model SU-8020 instrument. Transmission electron microscopy (TEM) images, high-resolution TEM (HRTEM) images were taken by a JEM-2100 transmission electron microscope operated at an accelerating voltage of 200 kV. X-ray photoelectron spectroscopy (XPS) measurements were tested on AXIS ULTRA spectrometer. The C1s peak energy of 284.5 eV was used as the calibration of binding energy data. X-ray diffraction (XRD) patterns were performed on a DX-2700 X-ray diffractometer with Cu K $\alpha$  radiation source ( $\lambda = 0.15418$  nm) and operating at 40 kV and 30 mA. Ultraviolet and visible spectroscopy (UV-vis) data were performed with UV-2600 spectrophotometer.

### **Synthesis of $Cu_2O$ nanocubes**

Typically, 1.0 mL 0.5 M PAA solution and 2 mL 0.05 M  $CuCl_2$  solution were first injected into 30 mL ultrapure water, successively. After stirred for 2 min, 2 mL 0.5 M KOH solution was mixed with 0.6 mL 0.5 M AA solution and diluted with water to 7 mL, followed by slowly dropping into the above solution under continuous stirring, and stirring for 30 min at room temperature. After the reaction, the orange samples were obtained by ultrasonication three times with ultrapure water and ethanol respectively, before vacuum drying at 60 °C for 12 hours to obtain the  $Cu_2O$  nanocubes.

### **Synthesis of bimetallic PdCu nanoboxes**

Typically, the 6.0 mg  $Cu_2O$  nanocubes were dissolved in 30 mL ultrapure water, followed by the injection of 0.5 mL 0.5 M PAA solution under stirring. After adjusting pH to 11 by 0.1 M KOH, 0.3 mL 0.05 M

K<sub>2</sub>PdCl<sub>4</sub> solution was injected into the above mixture under continuous stirring. The mixture was put into a stainless-steel kettle with a polytetrafluoroethylene liner, and was subsequently heated at 120 °C for 6 hours. After reaction, the unreacted Cu<sub>2</sub>O template in the solution was removed by 5 mL ammonia solution (NH<sub>3</sub>·H<sub>2</sub>O, 28%). Finally, the PdCu nanoboxes were obtained by centrifugation three times with ultrapure water and ethanol respectively before vacuum drying at 60 °C for 12 hours.

#### **Synthesis of solid PdCu nanoparticles**

To solid PdCu nanoparticles, we use NaBH<sub>4</sub> to directly reduce K<sub>2</sub>PdCl<sub>4</sub> and CuCl<sub>2</sub> in aqueous solution. Typically, 0.45 mL 0.05 M K<sub>2</sub>PdCl<sub>4</sub> solution and 0.55 mL 0.05 M CuCl<sub>2</sub> solution were injected into 10 mL ultrapure water at room temperature, then 200 mg NaBH<sub>4</sub> was introduced into the mixture solution under strong stirring for 2 hours. Vacuum drying at 60 °C for 12 hours after ultrasonic washing with water and ethanol.

#### **Catalytic reduction of Cr(VI)**

All photochemical tests were performed on an ultraviolet and visible (UV-vis) spectroscopy. A mixture containing ultrapure water (3 mL), K<sub>2</sub>Cr<sub>2</sub>O<sub>7</sub> (10 μL, 0.2 M), HCOOH (50 μL, 96%), catalyst (2 mg/mL) was taken into cuvette in the UV-vis spectroscopy at room temperature. At each predetermined time, the relationship can be monitored between wavelength and absorbance by the UV-vis spectroscopy. The kinetic rate constant (*k*) of catalysts can be quantitatively evaluated by following Equation (1) ( $\ln(C_t/C_0) = -kt$ ),<sup>1-3</sup> where C<sub>0</sub> and C<sub>t</sub> are the concentrations of Cr(VI) at t = 0 and time t, respectively. According to the relationship between reaction rate constants (*k*) and temperature (T) in the Arrhenius equation, the activation energy of chemical reaction can be calculated, which was calculated as Equation (2):<sup>4, 5</sup>

$$\ln k = -E_a / (RT) + \ln A \quad (2)$$

Where *k* is the reaction rate constants at different temperature T(K), R is the Molar gas constant (8.314 J/K·mol) and A is the pre-exponential factor.

## Experimental Data

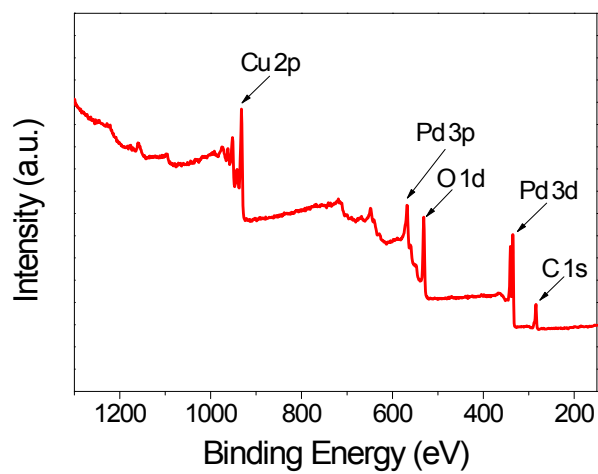

**Fig. S1** XPS survey scan spectrum of PdCu nanoboxes.

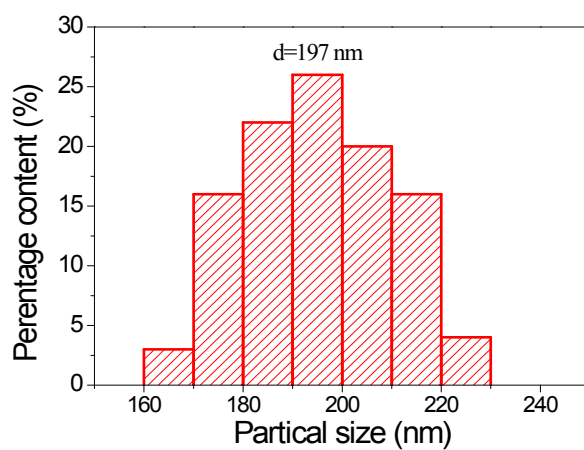

**Fig. S2** The corresponding particle-size distribution histogram of Cu<sub>2</sub>O nanocubes.

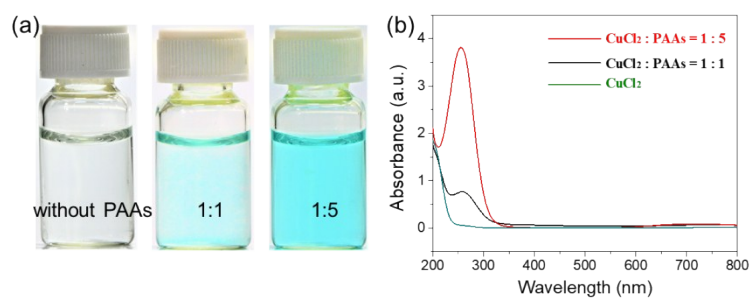

**Fig. S3** (a) Optical photos and (b) UV-vis spectra of  $\text{CuCl}_2$ -PAAs mixture with different  $\text{CuCl}_2$ /PAAs ratios: (a) without PAAs; (b)  $\text{CuCl}_2$ : PAAs=1:1; (c)  $\text{CuCl}_2$ : PAAs=1:5.

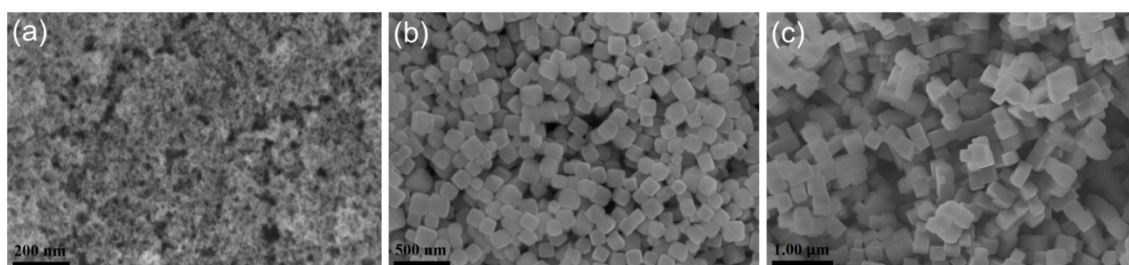

**Fig. S4** SEM images of  $\text{Cu}_2\text{O}$  nanocrystals with different  $\text{CuCl}_2$ /PAAs ratios: (a) without PAAs; (b)  $\text{CuCl}_2$ : PAAs=1:1; (c)  $\text{CuCl}_2$ : PAAs=1:5.

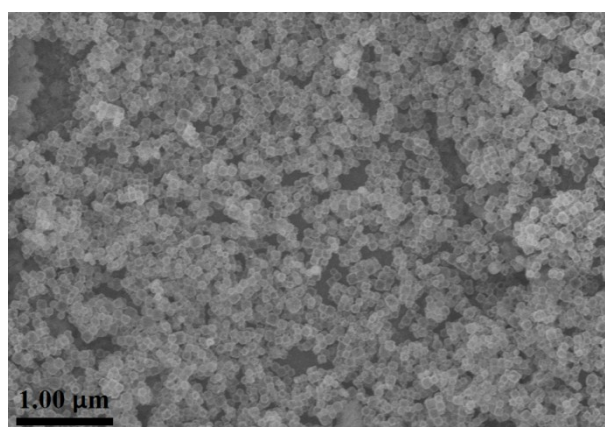

**Fig. S5** (a) Large-area SEM images of porous PdCu nanoboxes.

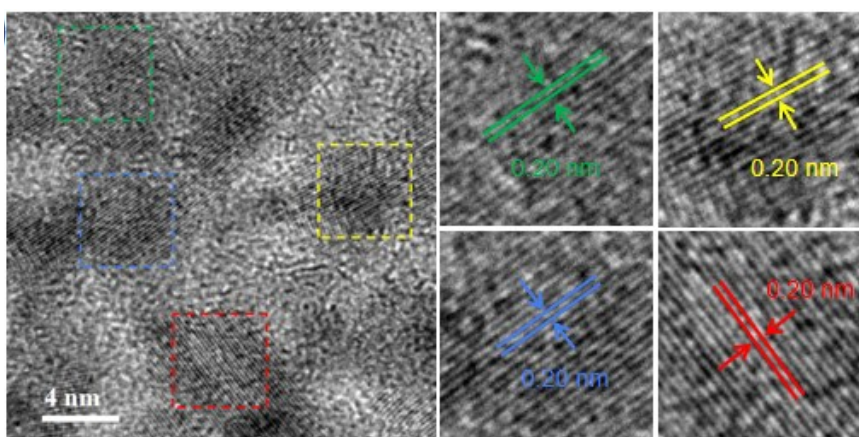

**Fig. S6** HRTEM images of PdCu nanoboxes at different lattice directions.

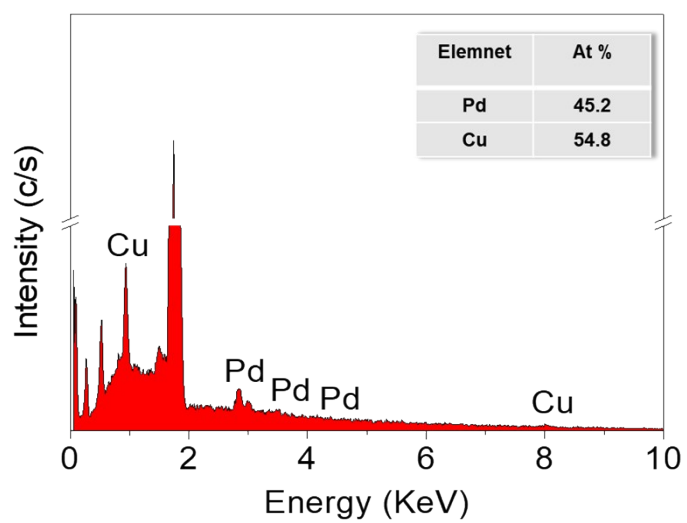

**Fig. S7** EDX spectrum of PdCu nanoboxes.

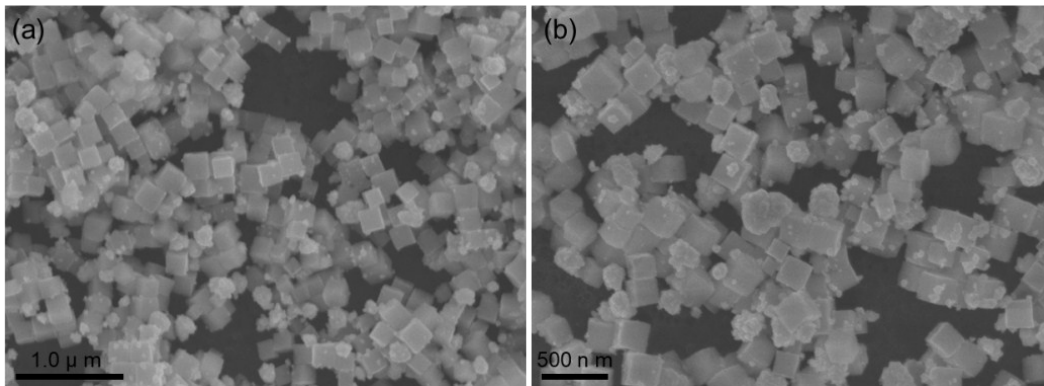

**Fig. S8** SEM images of  $\text{Cu}_2\text{O}@\text{PdCu}$  in the absence of PAAs.

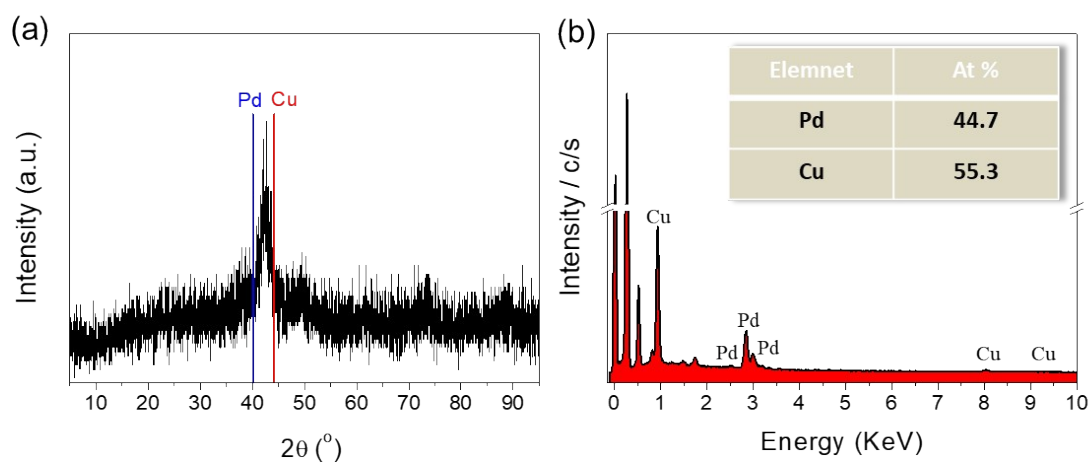

**Fig. S9** (a) XRD pattern and (b) EDX spectrum of solid PdCu nanoparticles.

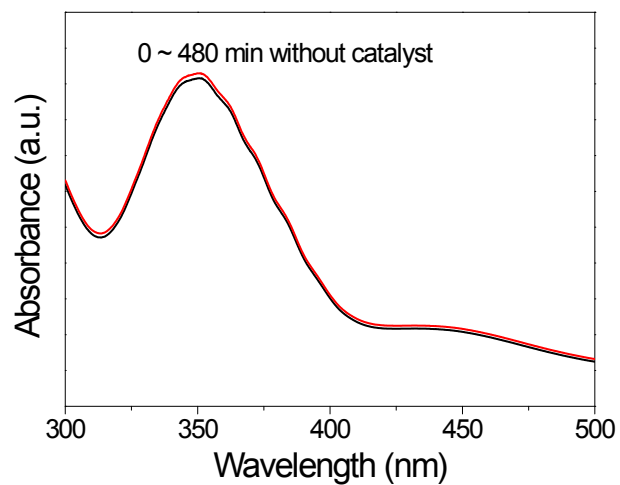

**Fig. S10** UV-vis spectrum for the reduction of Cr (VI) without catalyst at 25 °C.

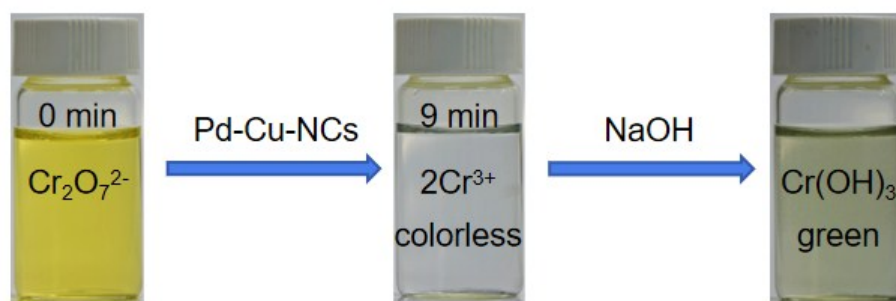

**Fig. S11** Photographs of Cr (VI) solution, Cr (III) solution and after adding the excess NaOH.



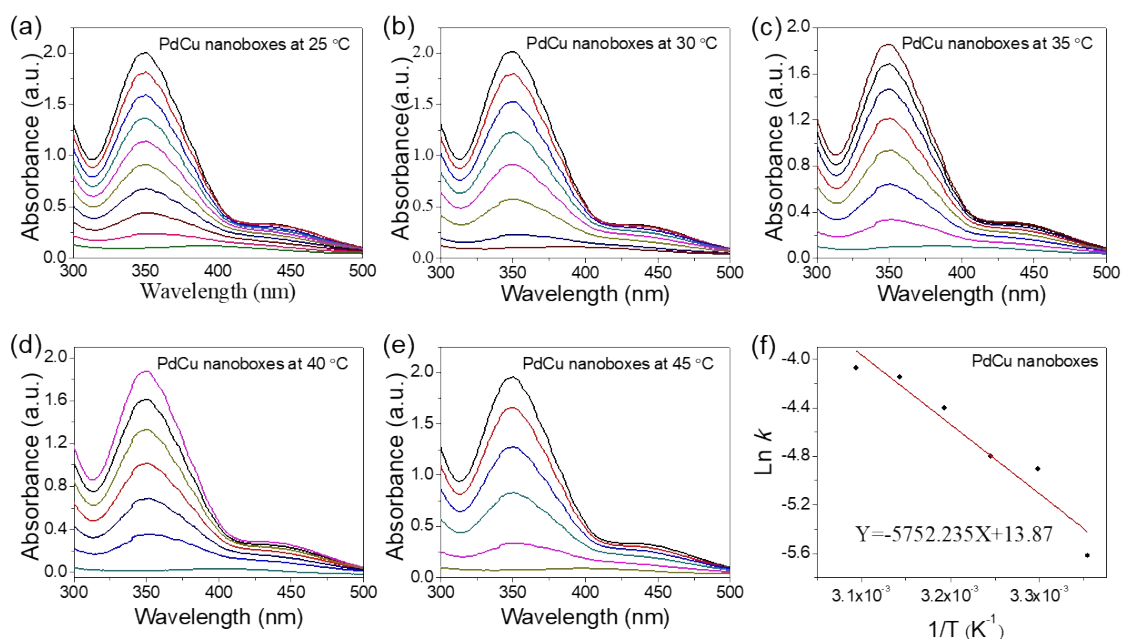

**Fig. S12** Time-dependent UV-vis spectra for the reduction of Cr (VI) on PdCu nanoboxes at different temperatures: (a) 25 °C, (b) 30 °C, (c) 35 °C, (d) 40 °C, (e) 45 °C; (f) plots of Ln  $k$  and  $1/T$  of the Cr(VI) reduction.

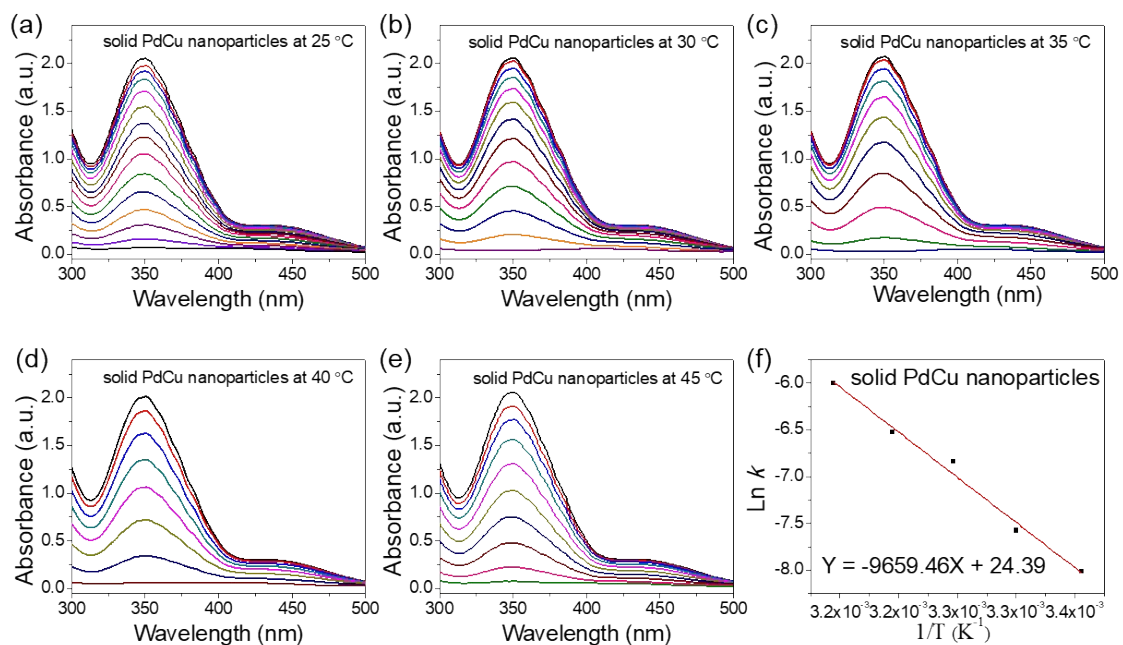

**Fig. S13** Time-dependent UV-vis spectra for the reduction of Cr (VI) on solid PdCu nanoparticles at different temperatures: (a) 25 °C, (b) 30 °C, (c) 35 °C, (d) 40 °C, (e) 45 °C; (f) plots of Ln  $k$  and  $1/T$  of the Cr(VI) reduction.

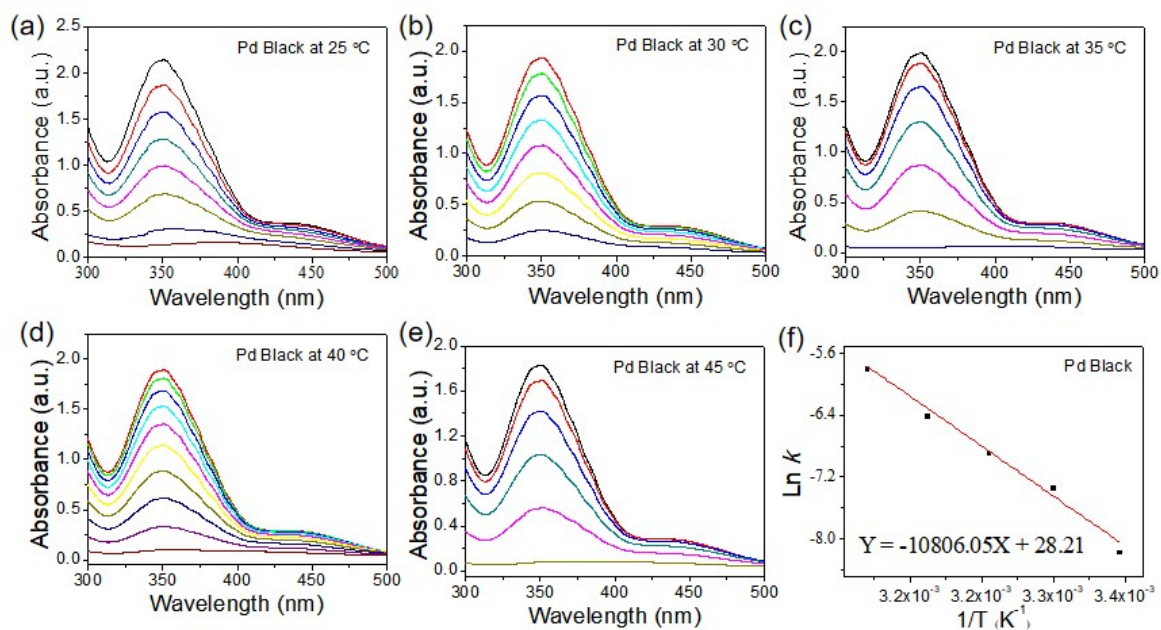

**Fig. S14** Time-dependent UV-vis spectra for the reduction of Cr (VI) on Pd Black at different temperatures: (a) 25 °C, (b) 30 °C, (c) 35 °C, (d) 40 °C, (e) 45 °C; (f) plots of Ln  $k$  and  $1/T$  of the Cr(VI) reduction.

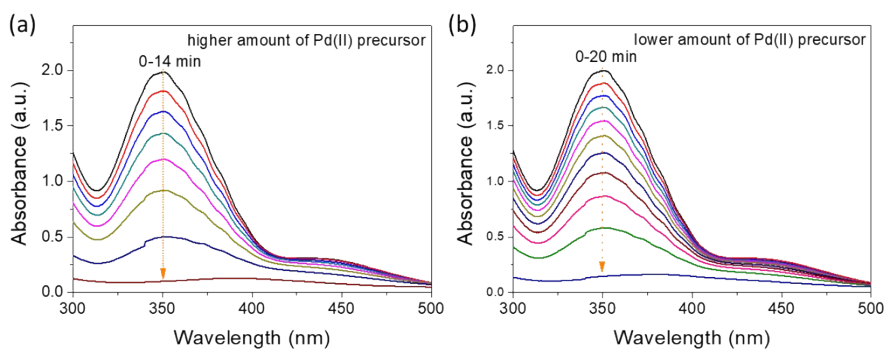

**Fig. S15** Time-dependent UV-vis spectra for the reduction of Cr (VI) on PdCu nanocrystals prepared at (a) higher amount of Pd(II) precursor and (b) lower amount of Pd(II) precursor.

**Table S1.** The performance comparisons of PdCu nanoboxes with those of previous-reported Pd-based materials.

| Catalysts                            | Cycle efficiency (cycle) | k (min <sup>-1</sup> ) | Ref.          |
|--------------------------------------|--------------------------|------------------------|---------------|
| PdCu Nanoboxes                       | 93.3% (10)               | 0.274                  | This work     |
| Pd NPs@pro-ESM                       | 91% (4)                  | 0.133                  | <sup>6</sup>  |
| Pd@SiO <sub>2</sub> -NH <sub>2</sub> | 85% (5)                  | 0.165                  | <sup>7</sup>  |
| Pd/bentonite                         | 91% (5)                  | /                      | <sup>8</sup>  |
| Pd-CNTs                              | 66% (10)                 | 0.310                  | <sup>9</sup>  |
| Pd <sub>urc</sub>                    | 93% (6)                  | 0.067                  | <sup>10</sup> |
| Pd/Fe-NMC                            | 75%                      | 0.154                  | <sup>11</sup> |

## References

1. G.-T. Fu, X. Jiang, R. Wu, S.-H. Wei, D.-M. Sun, Y.-W. Tang, T.-H. Lu and Y. Chen, *ACS Applied Materials & Interfaces*, 2014, **6**, 22790-22795.
2. S.-H. Han, J. Bai, H.-M. Liu, J.-H. Zeng, J.-X. Jiang, Y. Chen and J.-M. Lee, *Acs Applied Materials & Interfaces*, 2016, **8**, 30948-30955.
3. D.-N. Li, F.-Q. Shao, J.-J. Feng, J. Wei, Q.-L. Zhang and A.-J. Wang, *Materials Chemistry and Physics*, 2018, **205**, 64-71.
4. M. Grigante, M. Brighenti and D. Antolini, *Journal of Thermal Analysis and Calorimetry*, 2017, **129**, 553-565.
5. C. P. Lin and C. M. Shu, *Journal of Thermal Analysis and Calorimetry*, 2009, **95**, 547-552.
6. M. Liang, R. Su, W. Qi, Y. Zhang, R. Huang, Y. Yu, L. Wang and Z. He, *Industrial & Engineering Chemistry Research*, 2014, **53**, 13635-13643.
7. M. Celebi, M. Yurderi, A. Bulut, M. Kaya and M. Zahmakiran, *Applied Catalysis B-Environmental*, 2016, **180**, 53-64.
8. M. Nasrollahzadeh, S. M. Sajadi, M. Maham and I. Kohsari, *Microporous And Mesoporous Materials*, 2018, **271**, 128-137.
9. J. D. Kim and H. C. Choi, *Bulletin Of the Korean Chemical Society*, 2016, **37**, 744-747.
10. U. S. Markad, A. M. Kalekar, D. B. Naik, K. K. K. Sharma, K. J. Kshirasagar and G. K. Sharma, *Journal Of Photochemistry And Photobiology a-Chemistry*, 2017, **338**, 115-122.
11. S. Li, L. Tang, G. Zeng, J. Wang, Y. Deng, J. Wang, Z. Xie and Y. Zhou, *Environmental Science And Pollution Research*, 2016, **23**, 22027-22036.
